# Supplementary material for: Potential for manganese biofouling in water transmission lines using model reactors
Source: Royal Society of Chemistry journal article supplement (doi:10.1039/c8ew00074c), 2018-01-01
Supplement: c8ew00074c1.pdf [file c8ew00074c1.pdf]

|                          | <b>Pump House</b> | <b>Supply Plant</b> |
|--------------------------|-------------------|---------------------|
| <i>Manganese (µg/L)*</i> | 32.62 ± 12.32     | 26.3 ± 16.74        |
| <i>Temperature (°C)</i>  | 14.9 ± 4.1        | 15.8 ± 3.4          |
| pH                       | 5.25 ± 0.43       | 5.10 ± 0.53         |
| <i>Turbidity (NTU)</i>   | 0.790 ± 0.51      | 0.733 ± 0.50        |
| <i>DOC (mg/L)*</i>       | 3.260 ± 0.33      | 2.99 ± 0.361        |
| <i>TOC (mg/L)*</i>       | 3.530 ± 0.49      | 3.08 ± 0.741        |
| <i>Colour (NTU)</i>      | 14 ± 10           | 15 ± 14             |

Supplemental Table 1. Average influent water quality conditions for the Pump House and Supply Plant reactors. (\* P < 0.05)

|                                      | <b>Pump House</b> | <b>Supply Plant</b> |
|--------------------------------------|-------------------|---------------------|
| <i>Manganese (µg/cm<sup>2</sup>)</i> | 11.0 ± 4.8        | 36.2 ± 16.0         |
| <i>tATP (pg/cm<sup>2</sup>)</i>      | 15600 ± 9700      | 17600 ± 8800        |
| MOB (CFU/cm <sup>2</sup> )           | 99 ± 33           | 178 ± 56            |

Supplemental Table 2. Surface density of Mn, tATP and MOB on coupons in the Pump House and Supply Plant reactors.

**% Atomic Composition**

|                     | <b>C</b> | <b>N</b> | <b>O</b> | <b>Al</b> | <b>Si</b> | <b>Cl</b> | <b>Mn</b> | <b>Fe</b> |
|---------------------|----------|----------|----------|-----------|-----------|-----------|-----------|-----------|
| <b>Pump House</b>   | 62.91    | 4.37     | 29.54    | 0.33      | 0.58      | 0.05      | 1.03      | 1.18      |
| <b>Supply Plant</b> | 53.31    | 6.10     | 36.03    | 0.64      | 0.19      | 0.00      | 2.53      | 1.19      |

Table 3. Average atomic composition (%) of the Pump House and Supply Plant coupon surface elements obtained through EDS analysis.

|               | <b>Pump House</b> | <b>Supply Plant</b> |
|---------------|-------------------|---------------------|
| <i>Class</i>  | 15                | 11                  |
| <i>Order</i>  | 9                 | 5                   |
| <i>Family</i> | 8                 | 3                   |
| <i>Genus</i>  | 5                 | 1                   |

Supplemental Table 4. Relative abundance (%) of known MOB in Pump House and Supply Plant biofilms at the class, order, family and genus level.

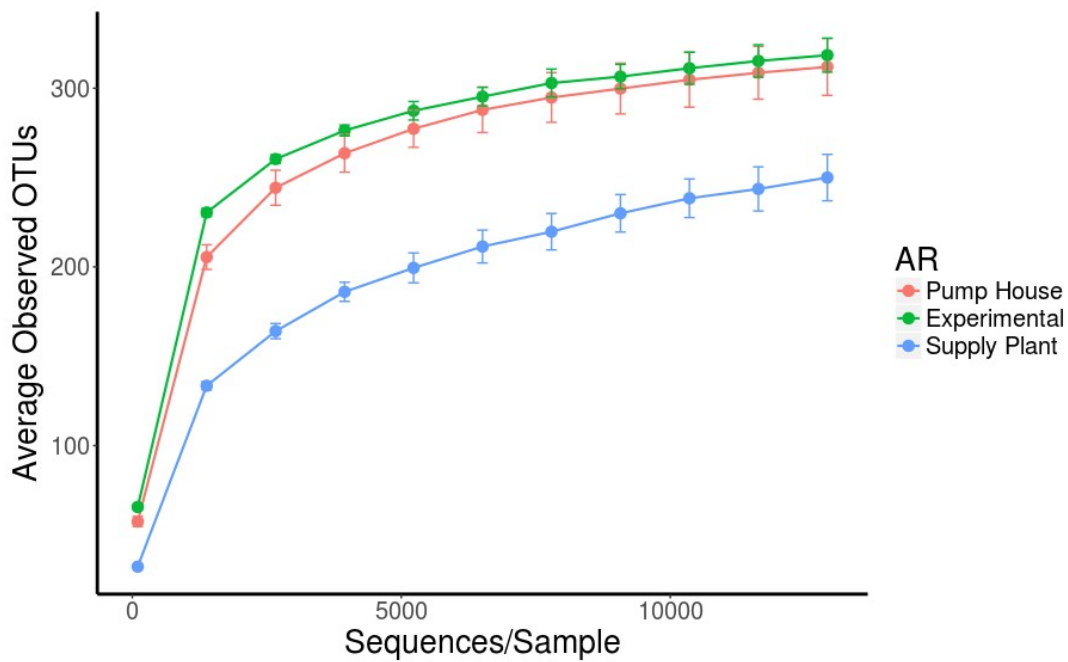

Supplemental Figure 1. Alpha rarefaction curves of biofilm communities within the Pump House, Experimental, and Supply Plant reactors.

|                                     |          |     |        |     |        |      |            |      |              |
|-------------------------------------|----------|-----|--------|-----|--------|------|------------|------|--------------|
| Leptothrix discophora SS-1          | MofA     | 304 | IHLHGG | 384 | WYHDHT | 1173 | HPVHGHLL   | 1278 | HCHILGHEENDF |
| Bacillus SG-1                       | MnxG     | 527 | MHIHFV | 572 | FFHDHL | 281  | HVFHYHVVH  | 334  | HVHLYPHFGIGM |
| Pedomicrobium sp. ACM 3067          | MoxA     | 129 | IHWHGQ | 170 | MYHPHA | 265  | HPIHMHGY   | 318  | HCHKSHHTMNAM |
| Bacillus pumilus WH4                | CotA     | 101 | VHLHGG | 149 | WYHDHA | 419  | HPIHLHLV   | 491  | HCHILEHEDYDM |
| Excherichia coli str. K-12 (MG1655) | CueO     | 100 | LHWHGL | 139 | WFHPHQ | 443  | HPFHIIHGT  | 499  | HCHLLEHEDTGM |
| Candidatus Koribacter versatilis    | ABF43180 | 134 | LHFHGL | 178 | WYHPHI | 485  | HAFHIIHQL  | 546  | HCHLLDHEDKGM |
| Candidatus Koribacter versatilis    | ABF41129 | 130 | LHFHGL | 174 | WYHPHV | 481  | HAFHIIHQL  | 541  | HCHLLEHEDRGM |
| Candidatus Koribacter versatilis    | ABF42365 | 415 | IHWHGI | 461 | IYHTHA | 234  | HPMHLHGA   | 291  | HCHFHAHISHDE |
| Candidatus Koribacter versatilis    | ABF40498 | 132 | IHFHGT | 175 | WYHPHP | 453  | HTFHIIHQQV | 512  | HCHILAHEDSGM |

Figure 7. Sequence alignment of MCO binding motifs A-D of CotA, CueO, MofA, MnxG, MoxA and four MCO homologues in *Candidatus Koribacter*. Homologues are identified by their GenBank Accession Numbers. The cofactor copper-binding histidine residues are highlighted.
